# Supplementary material for: Trials in “True” Dyslipidemic Patients Are Urged to Reconsider Comprehensive Lipid Management as a Means to Reduce Residual Cardiovascular Risk
Source: PubMed Central journal article supplement — Clin Pharmacol Ther. 2019 Apr 29;106(5):960–7. doi: 10.1002/cpt.1436 (PMC6849695; doi:10.1002/cpt.1436), 2019-04-29
Supplement: CPT-106-960-s001.pdf [file CPT-106-960-s001.pdf]

**Supplementary material to:**

***Trials in “true” dyslipidemic patients are urged to reconsider comprehensive lipid management as a means to reduce residual cardiovascular risk***

José P. Werba<sup>a</sup>, Lorenzo M. Vigo<sup>a</sup>, Fabrizio Veglia<sup>a</sup>, Giancarlo Marenzi<sup>a</sup>, Elena Tremoli<sup>a,b</sup>, Damiano Baldassarre<sup>a,c</sup>.

<sup>a</sup>Centro Cardiologico Monzino, IRCCS, Milan, Italy

<sup>b</sup>Dipartimento di Scienze Farmacologiche e Biomolecolari, Università di Milano, Milan - Italy.

<sup>c</sup>Department of Medical Biotechnology and Translational Medicine, Università di Milano, Milan - Italy.

**Corresponding Author:**

José Pablo Werba, M.D.

Centro Cardiologico Monzino, IRCCS

Via Carlo Parea, 4

Milan, Italy. Postal Code: 20138

phone +39-02-58002263

fax: +39-02-58002942

email: pablo.werba@ccfm.it

Alternate email: [pablo.werba@gmail.com](mailto:pablo.werba@gmail.com)

**Figure S1. Mismatch between baseline LDL-C levels at trial entry and range of lipid-related high cardiovascular risk (red zone)**

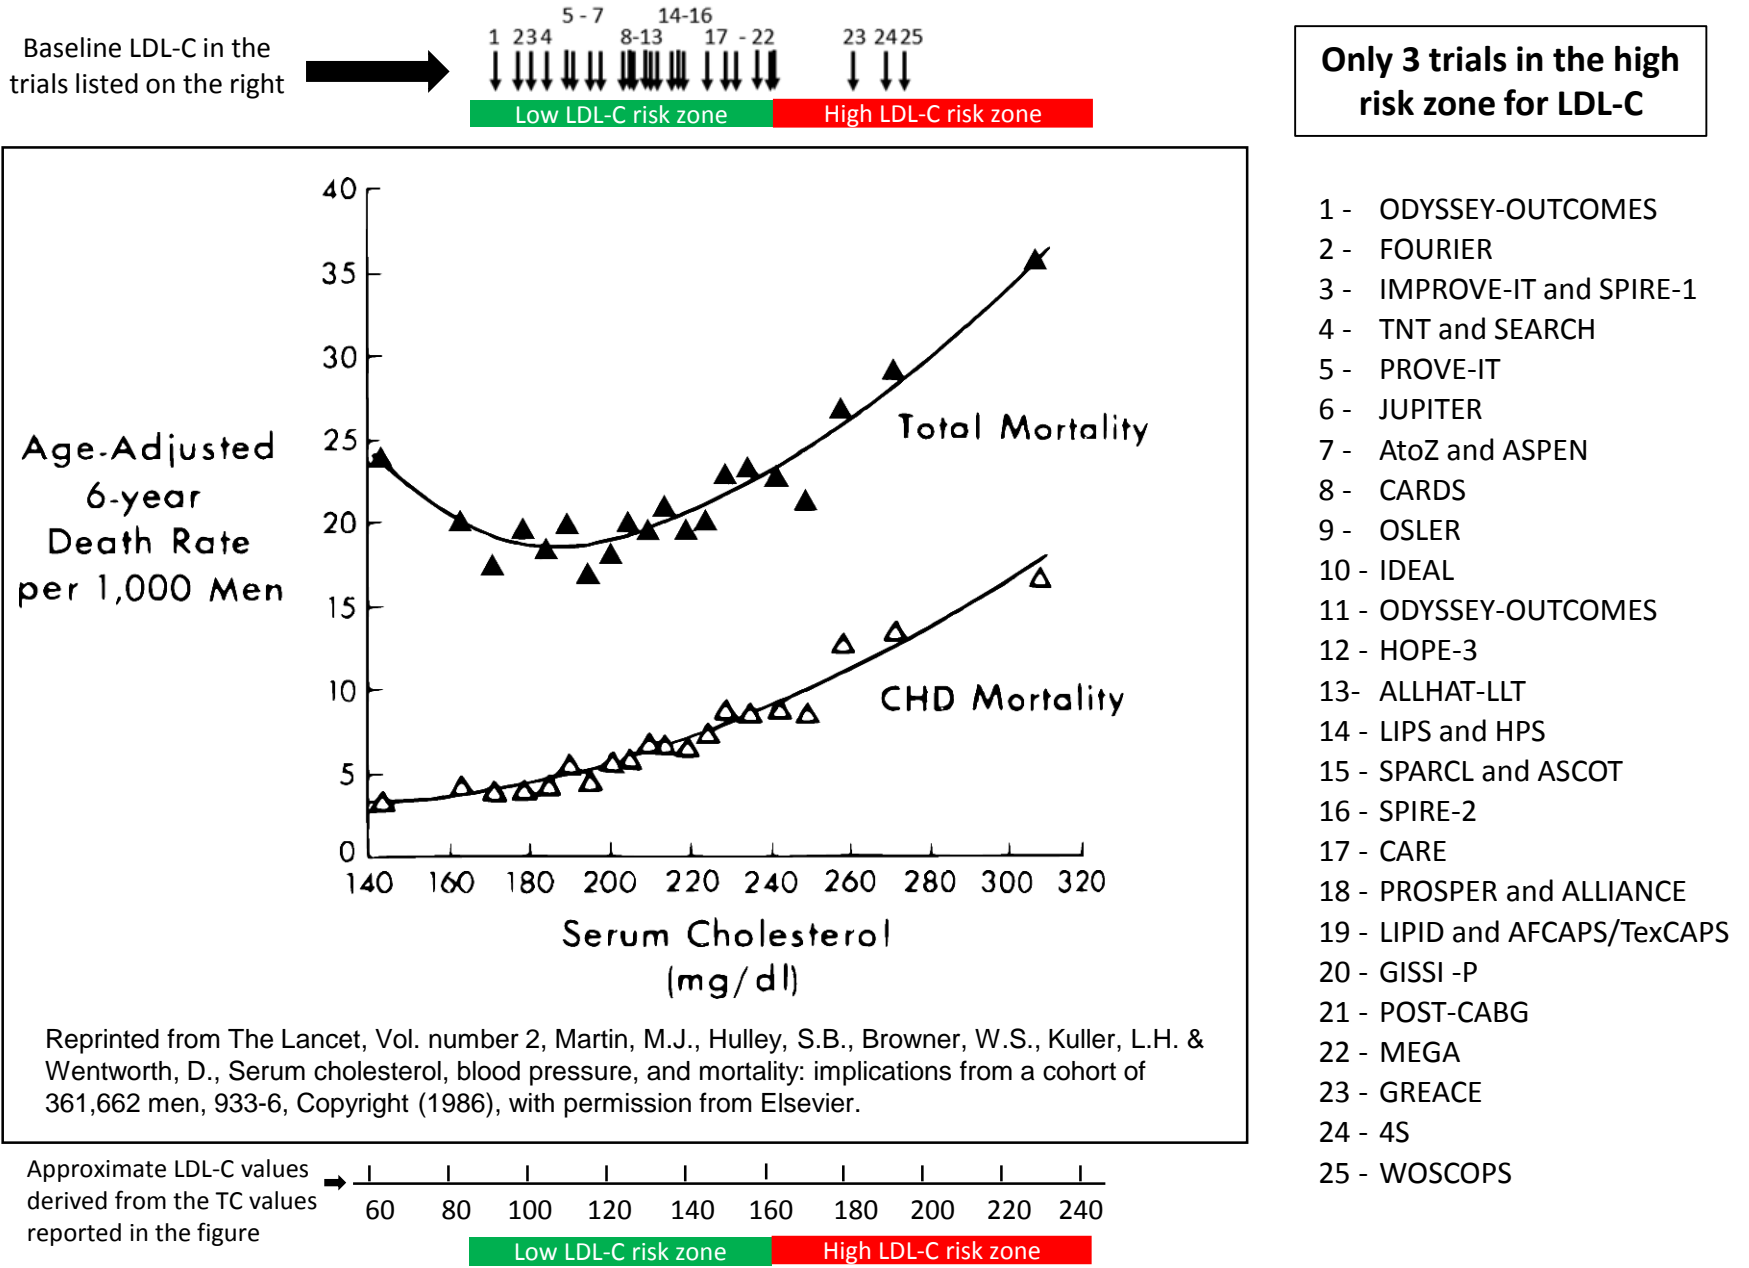

**Figure S2. Mismatch between baseline triglyceride levels at trial entry and range of lipid-related high cardiovascular risk (red zone)**

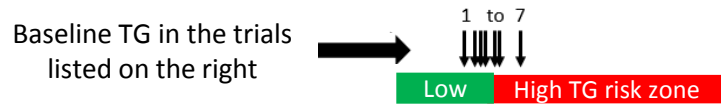

**All trials in the normal/borderline risk zone for TG**

The mismatch between baseline TG in the trials and TG-related risk is shown in reference to ischemic (coronary) heart disease outcomes (top panel, middle graph). The same concept may be applied to other cardiovascular outcomes.

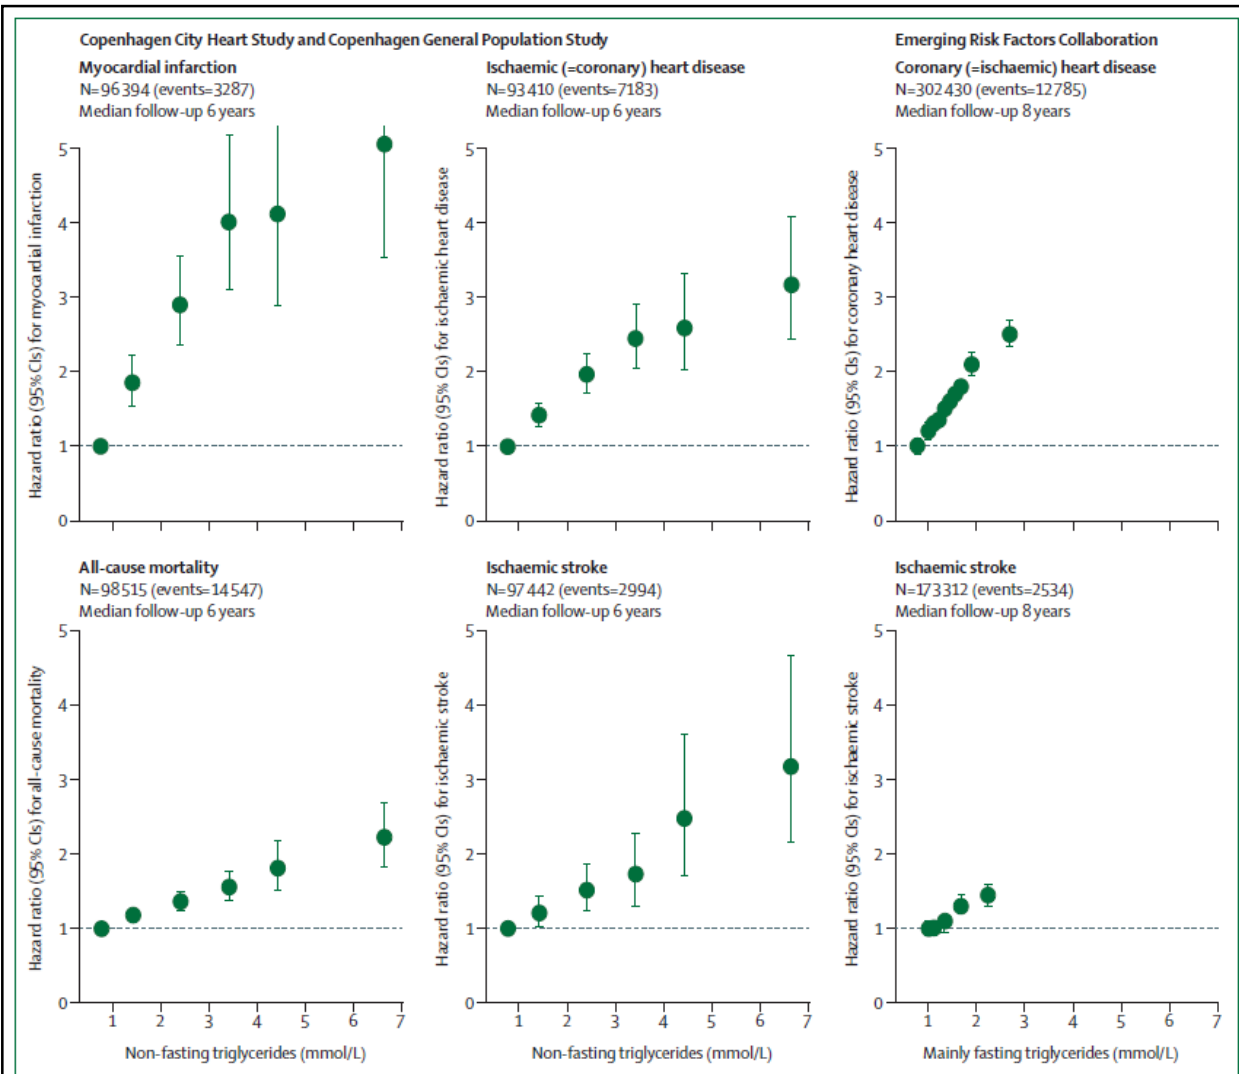

- 1 BIP
- 2 VA-HIT
- 3 FIELD
- 4 HHS
- 5 LEADER
- 6 ACCORD
- 7 DAIS

Reprinted from The Lancet, Vol. number 384, Nordestgaard, B.G. & Varbo, A. Triglycerides and cardiovascular disease, 626-35, Copyright (2014), with permission from Elsevier.

Figure S3. Mismatch between baseline HDL-C levels at trial entry and range of lipid-related high cardiovascular risk (red zone)

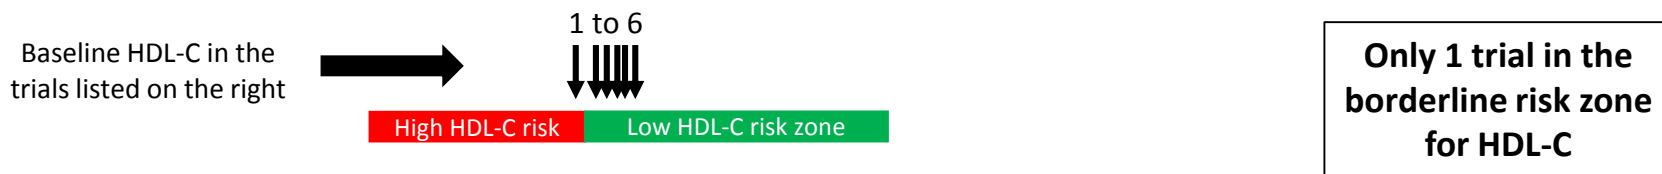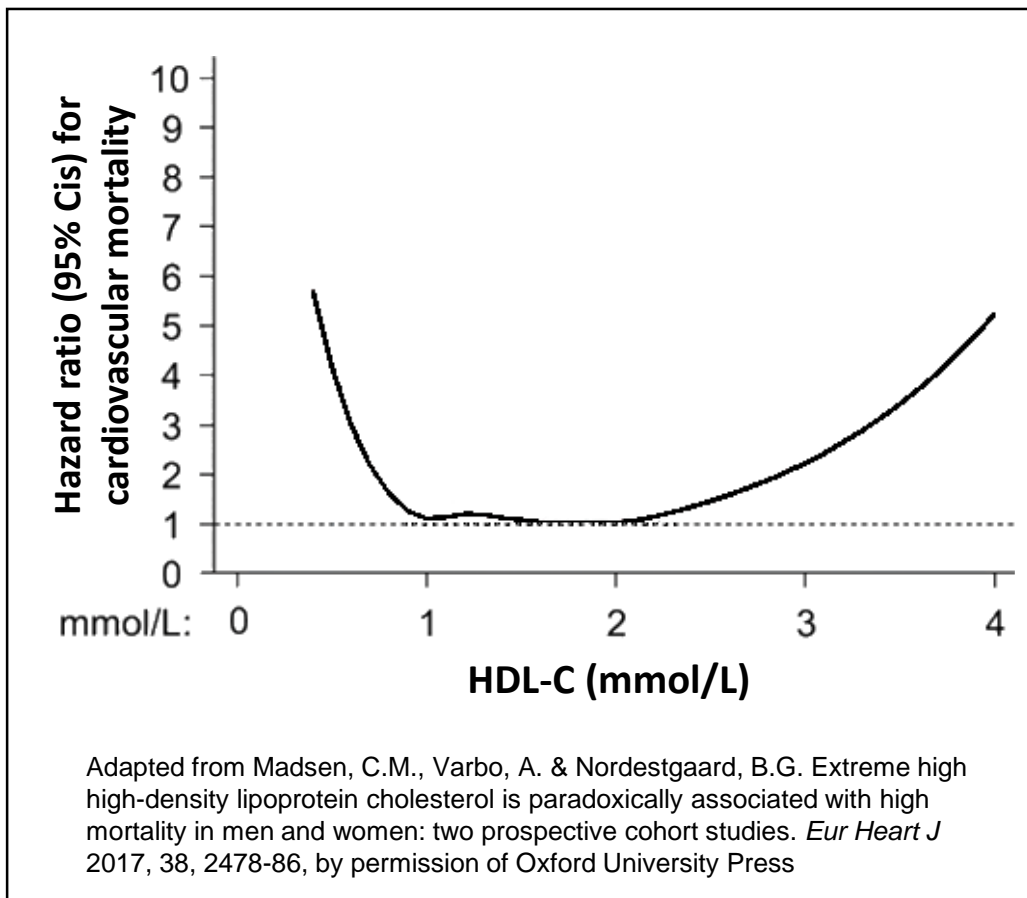

- 1 AIM-HIGH
- 2 REVEAL
- 3 DAL-OUTCOMES
- 4 HPS2-THRIVE
- 5 ACCELERATE
- 6 ILLUMINATE

**Table S1. Data of cardiovascular LDL-C trials included in Figure 2 (meta-regression analysis) of the main manuscript.**

| LDL TRIAL         | MEAN/MEDIAN Baseline LDL-C (intervention group) | Test treatment | Control treatment | Prevention | n= experimental group | n= control group | Achieved LDL-C mg/dl (experimental group) | Achieved LDL-C mg/dl (control group) | Between-group absolute difference achieved LDL-C (mg/dl) | Major Vascular Events (exp group) | Major Vascular Events (control group) | Relative Risk of major vascular events | Selected composite endpoint* |
|-------------------|-------------------------------------------------|----------------|-------------------|------------|-----------------------|------------------|-------------------------------------------|--------------------------------------|----------------------------------------------------------|-----------------------------------|---------------------------------------|----------------------------------------|------------------------------|
| WOSCOPS           | 192                                             | Prava 40       | Placebo           | Primary    | 3302                  | 3293             | 142                                       | 192                                  | 50                                                       | 174                               | 248                                   | 0.69 (0.57, 0.83)                      | 1,6                          |
| 4S                | 188                                             | Simva 20-40    | Placebo           | Secondary  | 2221                  | 2223             | 123                                       | 191                                  | 68                                                       | 431                               | 622                                   | 0.66 (0.59, 0.74)                      | 1,2,6                        |
| GREACE            | 180                                             | Atorva 10-80   | Usual care        | Secondary  | 800                   | 800              | 97                                        | 169                                  | 72                                                       | 41                                | 89                                    | 0.46 (0.32, 0.66)                      | 1,6                          |
| MEGA              | 157                                             | Prava 10-20    | Usual care        | Primary    | 3866                  | 3966             | 127                                       | 149                                  | 22                                                       | 98                                | 144                                   | 0.70 (0.54, 0.90)                      | 1,3,4,5,6                    |
| POST-CABG         | 156                                             | Lova 40-80     | Lova 2,5-5        | Secondary  | 676                   | 675              | 93                                        | 136                                  | 43                                                       | 85                                | 103                                   | 0.82 (0.63, 1.07)                      | 1,4,5,8                      |
| GISSI -P          | 152                                             | Prava 20       | No treatment      | Secondary  | 2138                  | 2133             | 130                                       | 146                                  | 17                                                       | 120                               | 136                                   | 0.90 (0.71, 1.15)                      | 1,5,8                        |
| LIPID             | 150                                             | Prava 40       | Placebo           | Secondary  | 4512                  | 4502             | 113                                       | 150                                  | 38                                                       | 557                               | 715                                   | 0.76 (0.68, 0.85)                      | 1,6                          |
| AFCAPS/TEXCAPS    | 150                                             | Lova 20-40     | Placebo           | Primary    | 3304                  | 3301             | 115                                       | 158                                  | 43                                                       | 116                               | 183                                   | 0.63 (0.50, 0.79)                      | 1,3,6                        |
| PROSPER           | 147                                             | Prava 40       | Placebo           | Both       | 2891                  | 2913             | 107                                       | 147                                  | 40                                                       | 408                               | 473                                   | 0.85 (0.74, 0.97)                      | 1,5,6                        |
| ALLIANCE          | 147                                             | Atorva 10-80   | Usual care        | Secondary  | 1217                  | 1225             | 95                                        | 110                                  | 15                                                       | 289                               | 333                                   | 0.83 (0.71, 0.97)                      | 1,2,3,4,6                    |
| CARE              | 139                                             | Prava 40       | Placebo           | Secondary  | 2081                  | 2078             | 98                                        | 136                                  | 38                                                       | 212                               | 274                                   | 0.76 (0.64, 0.91)                      | 1,6                          |
| SPIRE-2           | 134                                             | Bococizumab    | Placebo           | Both       | 5312                  | 5309             | 80                                        | 137                                  | 58                                                       | 179                               | 224                                   | 0.79 (0.65, 0.97)                      | 1,3,5,7                      |
| SPARCL            | 133                                             | Atorva 80      | Placebo           | Secondary  | 2365                  | 2366             | 73                                        | 129                                  | 56                                                       | 334                               | 407                                   | 0.80 (0.69, 0.92)                      | 1,2,5,6                      |
| ASCOT-LLA         | 133                                             | Atorva 10      | Placebo           | Primary    | 5168                  | 5137             | 90                                        | 127                                  | 37                                                       | 100                               | 154                                   | 0.64 (0.50, 0.83)                      | 1,6                          |
| LIPS              | 131                                             | Fluva 80       | Placebo           | Secondary  | 844                   | 833              | 97                                        | 138                                  | 41                                                       | 181                               | 222                                   | 0.78 (0.64, 0.95)                      | 1,4,6                        |
| HPS               | 131                                             | Simva 40       | Placebo           | Both       | 10269                 | 10267            | 89                                        | 128                                  | 39                                                       | 2033                              | 2585                                  | 0.76 (0.72, 0.81)                      | 1,4,5,6                      |
| ALLHAT-LLT        | 129                                             | Prava 40       | Usual care        | Both       | 5170                  | 5185             | 111                                       | 135                                  | 24                                                       | 380                               | 421                                   | 0.91 (0.79, 1.04)                      | 1,6                          |
| HOPE-3            | 128                                             | Rosuva 10      | Placebo           | Primary    | 6361                  | 6344             | 96                                        | 125                                  | 30                                                       | 235                               | 304                                   | 0.76 (0.64, 0.91)                      | 1,5,7                        |
| ODYSSEY LONG TERM | 123                                             | Alirocumab     | Placebo           | Both       | 1553                  | 788              | 48                                        | 119                                  | 71                                                       | 27                                | 26                                    | 0.52 (0.31, 0.90)                      | 1,2,3,5                      |
| IDEAL             | 122                                             | Atorva 40-80   | Simva 20-40       | Secondary  | 4439                  | 4449             | 82                                        | 104                                  | 22                                                       | 533                               | 608                                   | 0.87 (0.78, 0.98)                      | 1,2,5,6                      |
| OSLER             | 120                                             | Evolocumab     | Standard therapy  | Both       | 2976                  | 1489             | 48                                        | 120                                  | 72                                                       | 28                                | 30                                    | 0.47 (0.28, 0.78)                      | 1,3,4,5,8,9,10               |
| CARDS             | 118                                             | Atorva 10      | Placebo           | Primary    | 1428                  | 1410             | 82                                        | 121                                  | 39                                                       | 83                                | 127                                   | 0.63 (0.48, 0.83)                      | 1,3,4,5,6                    |
| ASPEN             | 113                                             | Atorva 10      | Placebo           | Both       | 1211                  | 1199             | 79                                        | 113                                  | 34                                                       | 166                               | 180                                   | 0.90 (0.73, 1.12)                      | 1,2,3,4,5,7                  |
| AtoZ              | 112                                             | Simva 40-80    | Simva 20          | Secondary  | 2265                  | 2232             | 66                                        | 81                                   | 15                                                       | 309                               | 343                                   | 0.89 (0.76, 1.04)                      | 1,3,5,7                      |

*Trials in “true” dyslipidemic patients are urged in order to reconsider comprehensive lipid management as a means to reduce residual cardiovascular risk – Supplemental v1.0*

|                  |     |              |           |           |       |       |    |     |    |      |      |                   |           |
|------------------|-----|--------------|-----------|-----------|-------|-------|----|-----|----|------|------|-------------------|-----------|
| JUPITER          | 108 | Rosuva 20    | Placebo   | Primary   | 8901  | 8901  | 55 | 109 | 54 | 142  | 251  | 0.56 (0.46, 0.69) | 1,3,4,5,7 |
| PROVE-IT         | 106 | Atorva 80    | Prava 40  | Secondary | 2099  | 2063  | 62 | 95  | 33 | 464  | 537  | 0.84 (0.74, 0.95) | 1,3,4,5,8 |
| TNT              | 97  | Atorva 80    | Atorva 10 | Secondary | 4995  | 5006  | 77 | 101 | 24 | 434  | 548  | 0.78 (0.69, 0.89) | 1,2,5,6   |
| SEARCH           | 97  | Simva 80     | Simva 20  | Secondary | 6031  | 6033  | 83 | 97  | 14 | 1477 | 1553 | 0.94 (0.88, 1.01) | 1,4,5,6   |
| SPIRE-1          | 94  | Bococizumab  | Placebo   | Both      | 8408  | 8409  | 52 | 100 | 48 | 173  | 173  | 0.99 (0.80, 1.22) | 1,3,5,7   |
| IMPROVE-IT       | 94  | Ezetimibe 10 | Placebo   | Secondary | 9067  | 9077  | 54 | 70  | 16 | 2572 | 2742 | 0.94 (0.89, 0.99) | 1,2,3,5,7 |
| FOURIER          | 92  | Evolocumab   | Placebo   | Secondary | 13784 | 13780 | 30 | 90  | 60 | 1344 | 1563 | 0.85 (0.79, 0.92) | 1,3,4,5,7 |
| ODYSSEY-OUTCOMES | 87  | Alirocumab   | Placebo   | Secondary | 9462  | 9462  | 47 | 97  | 50 | 903  | 1052 | 0.85 (0.78, 0.93) | 1,3,5,6   |

The cardiovascular LDL-C trials are sorted according to the mean baseline LDL-C level in the intervention group (from the highest to the lowest). Doses of statins and ezetimibe are expressed in mg/day. For statin trials, the outcome “major vascular events” used in this meta-regression were the combined outcomes selected in the statin meta-analysis reported by Silverman et al (reference 19) whereas for IMPROVE-IT and for trials with pcsk-9 inhibitors, “major vascular events” were the combined primary outcomes of each trial. The last column lists the individual components of the combined outcome for each study, as follows: 1: myocardial infarction; 2: resuscitated cardiac arrest; 3: hospitalization for unstable angina; 4: coronary revascularization; 5: stroke; 6: coronary death; 7: cardiovascular death; 8: all cause mortality; 9: transit ischemic attack; 10: heart failure.
